# Supplementary material for: Radiomics and Delta-Radiomics Signatures to Predict Response and Survival in Patients with Non-Small-Cell Lung Cancer Treated with Immune Checkpoint Inhibitors
Source: MDPI journal article supplement (doi:10.3390/cancers15071968), 2023-03-25
Supplement: s1 [file s1]

(a)

| Predictors         | Relevance |
|--------------------|-----------|
| Stats_Max          | 3.72      |
| Stats_P10          | 0.66      |
| Shape_Elongation   | 0.93      |
| Stats_Cov          | 0.35      |
| IH_Mode            | 0.62      |
| Fractal_Lacunarity | 0.51      |
| Stats_Median       | 0.81      |
| GLRLM_GLNN         | 0.6       |
| NGLDM_DE           | 1.8       |
| GLSZM_SAE          | 0.38      |

(b)

| Predictors       | Relative importance | Coefficient |
|------------------|---------------------|-------------|
| Stats_Max        | 0.51                | 0.65        |
| Shape_Elongation | 0.17                | 1.04        |
| IH_Mode          | 0.32                | -0.23       |

(c)

| Predictors            | Relevance | Predictors             | Relevance |
|-----------------------|-----------|------------------------|-----------|
| Shape_Elongation      | 2.00      | Stats_MedianD          | 0.34      |
| GLCM_SumAvg           | 0.42      | GLRLM_RLV              | 0.47      |
| LocInt_PeakGlobal     | 0.89      | LocInt_PeakLocal       | 1.19      |
| Stats_P90             | 1.10      | GLCM_MaxProb           | 0.55      |
| Fractal_SD            | 1.04      | GLCM_Contrast          | 0.47      |
| Stats_Mean            | 1.14      | GLCM_DiffEntro         | 0.42      |
| GLRLM_RE              | 0.91      | GLSZM_LILAE            | 0.72      |
| GLDZM_ZP              | 0.48      | GLCM_Energy            | 0.46      |
| Shape_LeastAxisLength | 0.70      | GLRLM_GLNN             | 0.55      |
| Stats_Cov             | 0.83      | GLCM_DiffVar           | 0.52      |
| NGLDM_DV              | 0.64      | NGLDM_LGLDE            | 0.56      |
| IH_RMeanD             | 0.58      | Stats_RMeanD           | 0.57      |
| GLRLM_SRE             | 0.45      | IH_MedianD             | 0.10      |
| Shape_Aspphericity    | 0.71      | IH_Cov                 | 0.56      |
| GLDZM_DZV             | 0.75      | Shape_Sphericity       | 0.70      |
| Stats_Median          | 1.24      | GLCM_InvDiffMomNor     | 0.70      |
| Shape_VolumeDensityBB | 1.48      | GLSZM_ZP               | 0.46      |
| GLCM_Homogeneity2     | 0.43      | NGLDM_DNN              | 0.50      |
| IH_Entropy            | 0.49      | NGLDM_GLN              | 0.44      |
| Stats_IQR             | 0.39      | Shape_AreaDensityBB    | 1.68      |
| GLDZM_LILDE           | 0.78      | Shape_Compactness3     | 0.70      |
| NGLDM_LDE             | 0.46      | Stats_Kurtosis         | 0.78      |
| NGTDM_Busyness        | 0.93      | Shape_CentroidDistance | 1.29      |
| Stats_QCOD            | 0.97      | Shape_Compactness2     | 0.73      |
| GLCM_Entrop2          | 0.51      | Shape_AreaDensityBE    | 0.91      |
