# Supplementary material for: Radiomics and Delta-Radiomics Signatures to Predict Response and Survival in Patients with Non-Small-Cell Lung Cancer Treated with Immune Checkpoint Inhibitors
Source: MDPI journal article supplement (doi:10.3390/cancers15071968), 2023-03-25
Supplement: s1 [file s1]

(a)

| Predictors                | Relevance |
|---------------------------|-----------|
| Shape Volume_delta        | 26.5      |
| GLDZM LILDE_delta         | 22.57     |
| IH P10                    | 0.52      |
| Shape Sphericity_delta    | 1.17      |
| Fractal Average_delta     | 1.09      |
| Stats P90                 | 2.65      |
| Shape AreaDensityBE_delta | 8.08      |
| NGTDM Contrast_delta      | 3.26      |
| IH Energy_delta           | 12.41     |
| GLCM Dissimilar_delta     | 4.16      |

(b)

| Predictors         | Relative importance | Coefficient |
|--------------------|---------------------|-------------|
| Shape Volume_delta | 0.56                | 0.76        |
| GLDZM LILDE_delta  | 0.44                | 4.61        |

(c)

| Predictors               | Relevance | Predictors                | Relevance |
|--------------------------|-----------|---------------------------|-----------|
| Shape Volume_delta       | 1.55      | Stats_QCOD                | 0.24      |
| GLSZM IV                 | 0.20      | GLRLM GLV                 | 0.20      |
| GLCM AutoCorr_delta      | 0.18      | Shape AreaDensityBE_delta | 0.58      |
| Shape VolumeDensityBB    | 0.67      | IH RMeanD                 | 0.22      |
| GLRLM SRLGE              | 0.14      | IH Skewness_delta         | 0.32      |
| GLSZM SZNN_delta         | 0.44      | Stats Cov                 | 0.32      |
| NGLDM DV                 | 0.29      | LocInt PeakLocal          | 0.43      |
| LocInt PeakGlobal_delta  | 0.60      | GLSZM SZNN                | 0.22      |
| Shape Compactness2_delta | 0.29      | GLCM InvDiffNorm_delta    | 0.32      |
| Stats RMeanD_delta       | 0.21      | GLSZM ZP_delta            | 0.31      |
| Shape Elongation_delta   | 0.69      | GLSZM LAE_delta           | 0.41      |
| IH QCOD_delta            | 0.30      | IH IQR                    | 0.07      |
| Stats RMS                | 0.24      | Shape MajorAxisLength     | 0.28      |
| GLCM InvDiffMomNor       | 0.22      | NGTDM Contrast_delta      | 0.29      |
| GLSZM INN                | 0.23      | GLCM InvDiffMomNor_delta  | 0.48      |
| Shape Asphericity        | 0.37      | Fractal SD_delta          | 0.37      |
| IH MinGrad_delta         | 0.54      | GLCM MaxCorr_delta        | 0.23      |
| GLRLM GLN_delta          | 0.41      | GLRLM RP_delta            | 0.25      |
| IH Kurtosis              | 0.27      | Stats Median              | 0.33      |
| GLDZM LILDE_delta        | 1.04      | NGTDM Busyness            | 0.31      |
| GLSZM HIE                | 0.16      | Stats Kurtosis_delta      | 0.26      |
| Shape Elongation         | 0.91      | NGLDM DV_delta            | 0.29      |
| IH MaxGradI_delta        | 0.30      | GLRLM LRE_delta           | 0.25      |
| GLCM ClusProm            | 0.20      | GLSZM LILAE_delta         | 0.30      |
| GLDZM ZP_delta           | 0.31      | Stats_Median_delta        | 0.28      |
