# Supplementary material for: Radiomics and Delta-Radiomics Signatures to Predict Response and Survival in Patients with Non-Small-Cell Lung Cancer Treated with Immune Checkpoint Inhibitors
Source: MDPI journal article supplement (doi:10.3390/cancers15071968), 2023-03-25
Supplement: s1 [file s1]

(a)

| Predictors                  | Relevance |
|-----------------------------|-----------|
| Shape_MinorAxisLength_delta | 43.54     |
| GLCM_Entrop2                | 1.28      |
| GLDZM_HISDE_delta           | 1.87      |
| Stats_Cov_delta             | 1.11      |
| Shape_Compactness2_delta    | 0.08      |
| IH_MinGrad_delta            | 7.23      |
| GLCM_Correl1_delta          | 9.72      |
| GLCM_InfoCorr1              | 5.04      |
| IH_MedianD                  | 3.94      |
| GLDZM_SDE_delta             | 8.43      |

(b)

| Predictors                  | Relative importance | Coefficient |
|-----------------------------|---------------------|-------------|
| Shape_MinorAxisLength_delta | 0.46                | -7.79       |
| GLCM_Entrop2                | 0.11                | -4.25       |
| IH_MinGrad_delta            | 0.12                | 2.98        |
| GLCM_InfoCorr1              | 0.17                | -12.81      |
| IH_MedianD                  | 0.14                | 1.90        |

(c)

| Predictors                | Relevance | Predictors                  | Relevance |
|---------------------------|-----------|-----------------------------|-----------|
| Shape_Compactness_delta   | 1.57      | NGTDM_Busyness_delta        | 0.18      |
| Shape_VolumeDensityBE     | 0.21      | IH_P10                      | 0.07      |
| IH_QCOD                   | 0.11      | GLCM_Correl1_delta          | 0.38      |
| Stats_P10_delta           | 0.11      | GLSZM_SZNN_delta            | 0.26      |
| Shape_Sphericity_delta    | 0.16      | GLCM_Correl1                | 0.17      |
| IH_Skewness_delta         | 0.27      | IH_QCOD_delta               | 0.09      |
| IH_P90_delta              | 0.08      | Shape_CentroidDistance      | 0.12      |
| GLSZM_SAE_delta           | 0.26      | GLSZM_SZV_delta             | 0.53      |
| GLRLM_RLNN_delta          | 0.13      | IH_Median                   | 0.05      |
| Shape_AreaDensityBE       | 0.16      | GLSZM_ZP_delta              | 0.27      |
| GLRLM_GLN_delta           | 0.47      | NGLDM_EN2                   | 0.24      |
| NGLDM_SM                  | 0.17      | NGLDM_LGLDE                 | 0.06      |
| Fractal_Average_delta     | 0.12      | GLDZM_HISDE_delta           | 0.10      |
| GLDZM_SDE                 | 0.20      | GLCM_InvDiffNorm_delta      | 0.46      |
| IH_MinGrad_delta          | 0.41      | IH_P90                      | 0.07      |
| NGTDM_Contrast_delta      | 0.20      | Stats_Kurtosis_delta        | 0.11      |
| Stats_Max_delta           | 0.15      | Stats_Mean_delta            | 0.18      |
| GLCM_ClusShade            | 0.16      | NGLDM_DNN_delta             | 0.09      |
| NGLDM_SM2                 | 0.30      | NGTDM_Strength_delta        | 0.12      |
| LocInt_PeakGlobal_delta   | 0.39      | Fractal_Lacunarity          | 0.13      |
| GLDZM_LDE                 | 0.18      | Shape_Elongation_delta      | 0.20      |
| IH_Kurtosis               | 0.18      | GLSZM_LAE_delta             | 0.56      |
| GLCM_InvDiffMomNor_delta  | 0.54      | Shape_MajorAxisLength_delta | 1.37      |
| Shape_AreaDensityBE_delta | 0.26      | GLSZM_LILAE_delta           | 0.32      |
| GLDZM_ZP_delta            | 0.28      | Stats_Mean                  | 0.15      |
