# Supplementary material for: Radiomics and Delta-Radiomics Signatures to Predict Response and Survival in Patients with Non-Small-Cell Lung Cancer Treated with Immune Checkpoint Inhibitors
Source: MDPI journal article supplement (doi:10.3390/cancers15071968), 2023-03-25
Supplement: s1 [file s1]

(a)

| Predictors       | Relevance |
|------------------|-----------|
| GLCM_InfoCorr1   | 11.79     |
| IH_Kurtosis      | 2.55      |
| NGLDM_DV         | 2.91      |
| Stats_P90        | 1.19      |
| IH_MinGradI      | 0.72      |
| GLSZM_SAE        | 2.47      |
| GLCM_InfoCorr2   | 6.20      |
| IH_MedianD       | 4.72      |
| NGTDM_Coarseness | 0.44      |
| NGLDM_LGSDE      | 0.85      |

(b)

| Predictors     | Relative importance | Coefficient |
|----------------|---------------------|-------------|
| GLCM_InfoCorr1 | 0.20                | -11.31      |
| NGLDM_DV       | 0.28                | 1.29        |
| GLCM_InfoCorr2 | 0.24                | -7.07       |
| IH_MedianD     | 0.27                | 1.41        |

(c)

| Predictors             | Relevance | Predictors            | Relevance |
|------------------------|-----------|-----------------------|-----------|
| NGLDM_DV               | 2.13      | LocInt_PeakLocal      | 1.42      |
| IH_Mode                | 0.46      | GLRLM_GLNN            | 0.80      |
| GLSZM_LILAE            | 0.91      | Stats_RMS             | 1.34      |
| GLCM_ClusProm          | 1.03      | IH_Entropy            | 0.77      |
| GLCM_Entrop2           | 0.74      | GLCM_Energy           | 1.07      |
| GLRLM_SRE              | 0.93      | Stats_IQR             | 0.70      |
| Shape_MaxDiameter_3_D  | 0.83      | GLCM_Homogeneity1     | 0.84      |
| Stats_Cov              | 1.53      | IH_MedianD            | 0.17      |
| NGLDM_DNN              | 1.60      | GLCM_DiffEntro        | 0.84      |
| Shape_Flatness         | 1.95      | GLDZM_LILDE           | 1.24      |
| NGLDM_GLN              | 0.74      | GLCM_Homogeneity2     | 0.92      |
| Stats_QCOD             | 1.54      | NGLDM_LGLDE           | 0.77      |
| NGTDM_Busyness         | 1.42      | GLCM_Dissimilar       | 0.92      |
| GLRLM_RP               | 1.05      | IH_Cov                | 1.23      |
| Shape_VolumeDensityBB  | 1.56      | GLRLM_LRLGE           | 0.80      |
| GLCM_CorrelI           | 1.54      | GLSZM_LISAE           | 0.93      |
| Shape_CentroidDistance | 1.47      | Shape_MajorAxisLength | 1.02      |
| Shape_VolumeDensityBE  | 1.82      | IH_Kurtosis           | 1.57      |
| LocInt_PeakGlobal      | 1.74      | IH_Uniformity         | 0.84      |
| NGTDM_Contrast         | 1.12      | GLDZM_LISDE           | 1.04      |
| Shape_Compactness3     | 1.23      | NGLDM_LGSDE           | 1.38      |
| GLCM_InvDiffMomNor     | 1.14      | GLDZM_HISDE           | 1.18      |
| NGLDM_LDE              | 1.45      | NGTDM_Coarseness      | 0.77      |
| GLCM_MaxProb           | 1.21      | GLSZM_IN              | 0.96      |
| GLCM_Contrast          | 0.78      | NGLDM_GLNN            | 0.82      |
