# Supplementary material for: Radiomics and Delta-Radiomics Signatures to Predict Response and Survival in Patients with Non-Small-Cell Lung Cancer Treated with Immune Checkpoint Inhibitors
Source: MDPI journal article supplement (doi:10.3390/cancers15071968), 2023-03-25
Supplement: s1 [file s1]

(a)

| Predictors            | Relevance |
|-----------------------|-----------|
| IH_MedianD            | 6.27      |
| Shape_Flatness        | 0.75      |
| IH_Skewness           | 0.57      |
| NGLDM_DE              | 4.57      |
| Stats_P90             | 0.87      |
| NGTDM_Coarseness      | 2.21      |
| GLDZM_SDE             | 0.75      |
| GLCM_ClusShade        | 0.71      |
| NGLDM_EN2             | 4.57      |
| Shape_VolumeDensityBE | 0.28      |

(b)

| Predictors     | Relative importance | Coefficient |
|----------------|---------------------|-------------|
| IH_MedianD     | 0.414915            | 0.867104    |
| NGLDM_DE       | 0.275619            | 4.120108    |
| Stats_P90      | 0.216907            | -2.1779     |
| GLCM_ClusShade | 0.092559            | -0.07551    |

(c)

| Predictors             | Relevance | Predictors            | Relevance |
|------------------------|-----------|-----------------------|-----------|
| Shape_Flatness         | 1.21      | GLDZM_HIE             | 0.51      |
| IH_MeanD               | 0.23      | Shape_Sphericity      | 0.57      |
| Shape_CentroidDistance | 0.55      | Stats_Cov             | 0.47      |
| Shape_AreaDensityBB    | 0.63      | IH_P10                | 0.33      |
| LocInt_PeakGlobal      | 0.65      | GLSZM_LIE             | 0.41      |
| GLRLM_RLV              | 0.41      | LocInt_PeakLocal      | 0.59      |
| GLRLM_RE               | 0.51      | Stats_IQR             | 0.26      |
| GLCM_Energy            | 0.34      | Shape_MajorAxisLength | 0.60      |
| Stats_MeanD            | 0.22      | NGTDM_Contrast        | 0.37      |
| NGTDM_Busyness         | 0.49      | GLCM_InvDiffMomNor    | 0.41      |
| Stats_Median           | 0.61      | GLRLM_LGRE            | 0.35      |
| Stats_Std              | 0.24      | Stats_Kurtosis        | 1.03      |
| Stats_QCOD             | 0.56      | Stats_MedianD         | 0.26      |
| Stats_P90              | 0.54      | GLCM_Homogeneity2     | 0.32      |
| GLSZM_SAE              | 0.48      | GLCM_DiffEntro        | 0.34      |
| GLCM_MaxProb           | 0.38      | NGLDM_LGSDE           | 0.38      |
| Stats_Mean             | 0.49      | NGLDM_DNN             | 0.46      |
| GLCM_SumSquares        | 0.26      | Shape_LeastAxisLength | 0.47      |
| GLCM_Entrop2           | 0.28      | GLSZM_SZV             | 0.37      |
| GLSZM_ZP               | 0.28      | GLCM_Homogeneity1     | 0.32      |
| GLDZM_LILDE            | 0.58      | GLCM_Dissimilar       | 0.33      |
| GLSZM_LAE              | 0.36      | GLCM_InverseVar       | 0.26      |
| NGLDM_LGLDE            | 0.33      | GLDZM_LISDE           | 0.43      |
| GLRLM_LRLGE            | 0.41      | IH_Kurtosis           | 1.04      |
| GLSZM_LISAE            | 0.35      | GLCM_DiffAvg          | 0.32      |
