# Supplementary material for: Radiomics and Delta-Radiomics Signatures to Predict Response and Survival in Patients with Non-Small-Cell Lung Cancer Treated with Immune Checkpoint Inhibitors
Source: MDPI journal article supplement (doi:10.3390/cancers15071968), 2023-03-25
Supplement: s1 [file s1]

**Supplementary Table S1:** Anatomical location of the segmented lesions

| Lesion location                                      | Training set                |                            | Test set                   |                           |
|------------------------------------------------------|-----------------------------|----------------------------|----------------------------|---------------------------|
|                                                      | Target lesions<br>(n = 345) | Index lesions<br>(n = 146) | Target lesions<br>(n = 91) | Index lesions<br>(n = 42) |
| Lung                                                 | 173                         | 120                        | 47                         | 34                        |
| Lymph node                                           | 104                         | 14                         | 24                         | 2                         |
| Liver                                                | 21                          | 4                          | 4                          | 2                         |
| Adrenal                                              | 24                          | 2                          | 9                          | 1                         |
| Soft tissue                                          | 9                           | 3                          | 6                          | 3                         |
| Other <sup>a</sup>                                   | 14                          | 3                          | 1                          | 0                         |
| <sup>a</sup> Other include spleen, kidney and pleura |                             |                            |                            |                           |
