# Supplementary material for: Radiomics and Delta-Radiomics Signatures to Predict Response and Survival in Patients with Non-Small-Cell Lung Cancer Treated with Immune Checkpoint Inhibitors
Source: MDPI journal article supplement (doi:10.3390/cancers15071968), 2023-03-25
Supplement: s1 [file s1]

(a)

| Predictors             | Relevance |
|------------------------|-----------|
| NGLDM DE               | 5.74      |
| NGLDM SM               | 0.78      |
| Shape Flatness         | 0.6       |
| Stats P90              | 2.63      |
| Shape CentroidDistance | 1.22      |
| GLRLM_RLV              | 4.82      |
| GLRLM_GLV              | 0.15      |
| GLCM_Energy            | 0.72      |
| GLCM_SumEntro          | 0.21      |
| NGTDM_Busyness         | 0.16      |

(b)

| Predictors     | Relative importance | Coefficient |
|----------------|---------------------|-------------|
| NGLDM DE       | 0.73                | -2.90       |
| Shape Flatness | 0.27                | -0.68       |

(c)

| Predictors             | Relevance | Predictors             | Relevance |
|------------------------|-----------|------------------------|-----------|
| Shape_Elongation       | 3.55      | Shape_CentroidDistance | 2.25      |
| IH_Kurtosis            | 1.97      | GLCM_Contrast          | 1.24      |
| GLCM_DiffVar           | 1.34      | IH_MedianD             | 0.20      |
| Shape_MaxDiameter_2_D0 | 1.64      | Stats_QCOD             | 2.19      |
| GLCM_Homogeneity2      | 1.22      | GLCM_Homogeneity1      | 1.21      |
| GLSZM_SAE              | 1.94      | GLDZM_LILDE            | 1.72      |
| Stats_Cov              | 1.93      | GLCM_Entrop2           | 1.11      |
| GLCM_DiffAvg           | 1.14      | GLCM_MaxProb           | 1.40      |
| GLRLM_RLV              | 1.48      | GLCM_Dissimilar        | 1.11      |
| Shape_VolumeDensityBB  | 2.74      | GLCM_Energy            | 1.21      |
| NGTDM_Contrast         | 1.57      | GLCM_DiffEntro         | 1.15      |
| GLCM_InvDiffMomNor     | 1.49      | GLCM_InverseVar        | 1.35      |
| GLSZM_ZP               | 1.45      | Stats_MedianD          | 0.70      |
| NGLDM_LDE              | 1.43      | Shape_Aspphericity     | 1.78      |
| LocInt_PeakGlobal      | 2.63      | GLDZM_ZP               | 1.43      |
| Stats_Median           | 2.59      | NGLDM_DNN              | 1.63      |
| Stats_RMS              | 2.29      | GLSZM_SZV              | 1.44      |
| Shape_SpherDisprop     | 1.91      | GLSZM_LILAE            | 1.56      |
| GLRLM_GLNN             | 1.04      | NGLDM_SDE              | 1.37      |
| GLCM_SumSquares        | 0.92      | GLRLM_LRE              | 1.36      |
| Shape_VolumeDensityBE  | 2.41      | Shape_Flatness         | 3.00      |
| Stats_RMeanD           | 1.09      | Shape_AreaDensityBB    | 3.10      |
| Stats_P90              | 2.44      | NGTDM_Strength         | 1.82      |
| LocInt_PeakLocal       | 3.16      | GLSZM_LAE              | 1.42      |
| NGTDM_Busyness         | 1.98      | GLSZM_SZNN             | 1.87      |
